# Supplementary material for: Mechanistic Insight in Permeability through Different Membranes in the Presence of Pharmaceutical Excipients: A Case of Model Hydrophobic Carbamazepine
Source: MDPI journal article supplement (doi:10.3390/pharmaceutics16020184), 2024-01-28
Supplement: s1 [file s1]

## Supplementary Material

### Table of Contents

|           |                                                                                                                                                                                                                                                                                                                                           |
|-----------|-------------------------------------------------------------------------------------------------------------------------------------------------------------------------------------------------------------------------------------------------------------------------------------------------------------------------------------------|
| Figure S1 | Refractive index vs. concentration of F127 pure (a), F127 in the presence of CBZ (b), SBE- $\beta$ -CD pure (c), and SBE- $\beta$ -CD in the presence of CBZ (d) at 37 °C.                                                                                                                                                                |
| Figure S2 | Plot of $(S_2(CBZ) - S_2^0(CBZ))$ on $(C_{F-127} - CMC)$ dependence at different concentrations of F-127 in buffer pH 6.8, 37 °C.                                                                                                                                                                                                         |
| Figure S3 | Debye-plots for systems of F-127 (black squares) and F127+CBZ (red circles) in buffer pH 6.8.                                                                                                                                                                                                                                             |
| Figure S4 | Plots of $(S_2(CBZ) - S_2^0(CBZ)) / S_2^0(CBZ)$ on $(C_{F127} - CMC)$ (a,c) and $C_{SBE-\beta-CD}$ (b,d) dependences used for the F127/buffer and SBE- $\beta$ -CD/buffer partition coefficients calculation (a) and (b) - from molar concentrations, (c) and (d) - from the concentrations expressed in kg·L <sup>-1</sup> units; 37 °C. |
| Table S1  | Solubility of CBZ at 37.0±0.1°C.                                                                                                                                                                                                                                                                                                          |
| Table S2  | Free fraction ( $f_{free}$ ) of CBZ at different excipient concentrations.                                                                                                                                                                                                                                                                |
| Table S3  | Donor solution concentrations ( $C_0$ ) and steady state flux ( $J$ ) of CBZ in pure buffer pH 6.8 and in F127 and SBE- $\beta$ -CD solutions at 37 °C.                                                                                                                                                                                   |
| Table S4  | Viscosity of the donor solutions at 37 °C.                                                                                                                                                                                                                                                                                                |

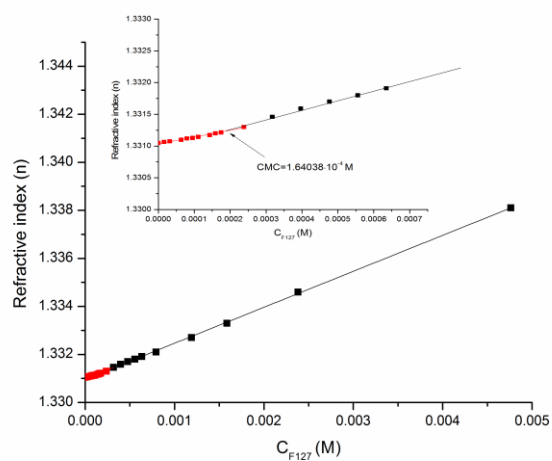

(a)

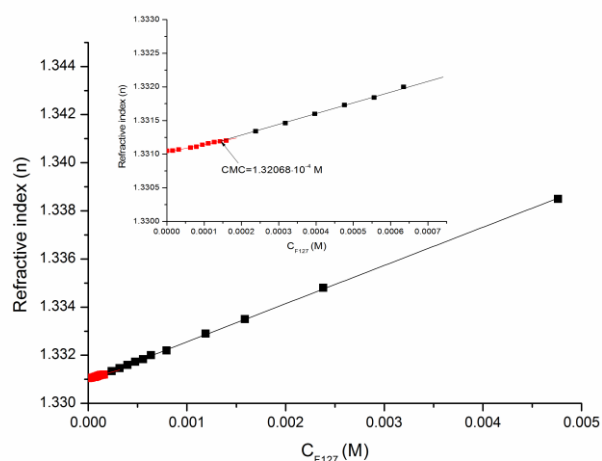

(b)

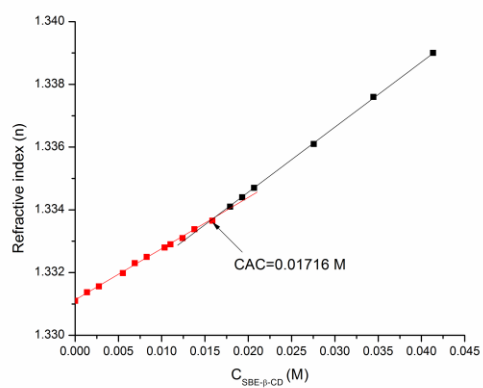

(c)

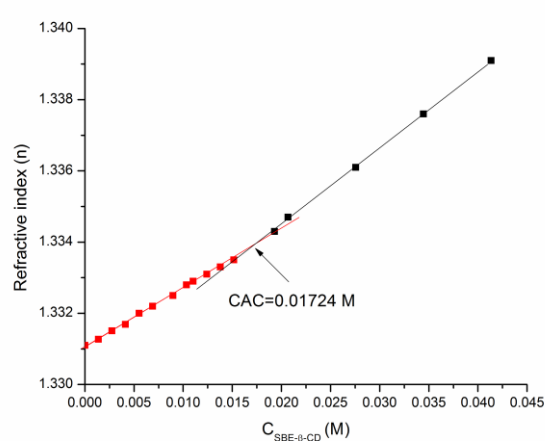

(d)

**Figure S1.** Refractive index vs. concentration of F127 pure (a), F127 in the presence of CBZ (b), SBE- $\beta$ -CD pure (c), and SBE- $\beta$ -CD in the presence of CBZ (d) at 37 °C.

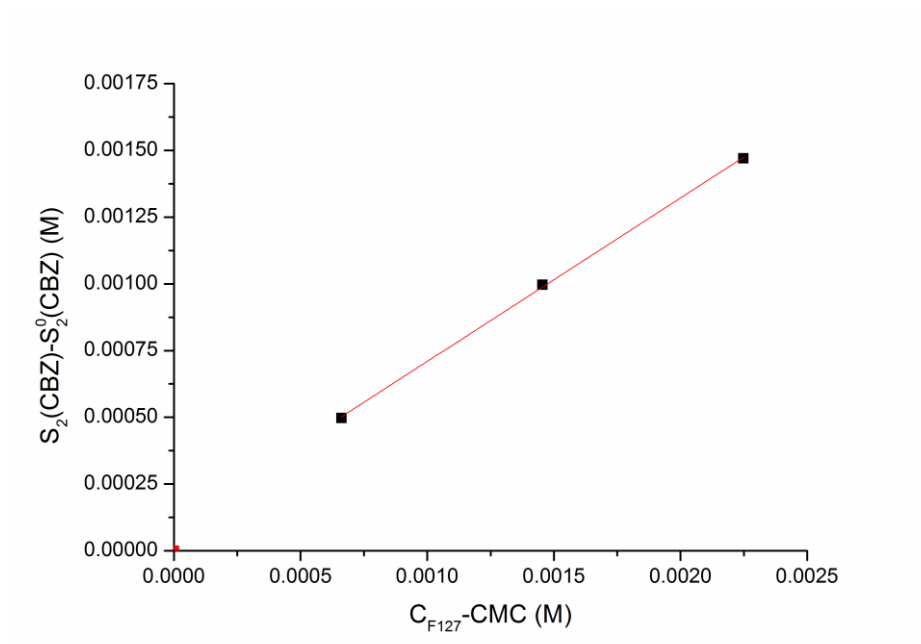

**Figure S2.** Plot of  $(S_2(CBZ) - S_2^0(CBZ))$  on  $(C_{F-127} - CMC)$  dependence at different concentrations of F-127 in buffer pH 6.8, 37 °C.

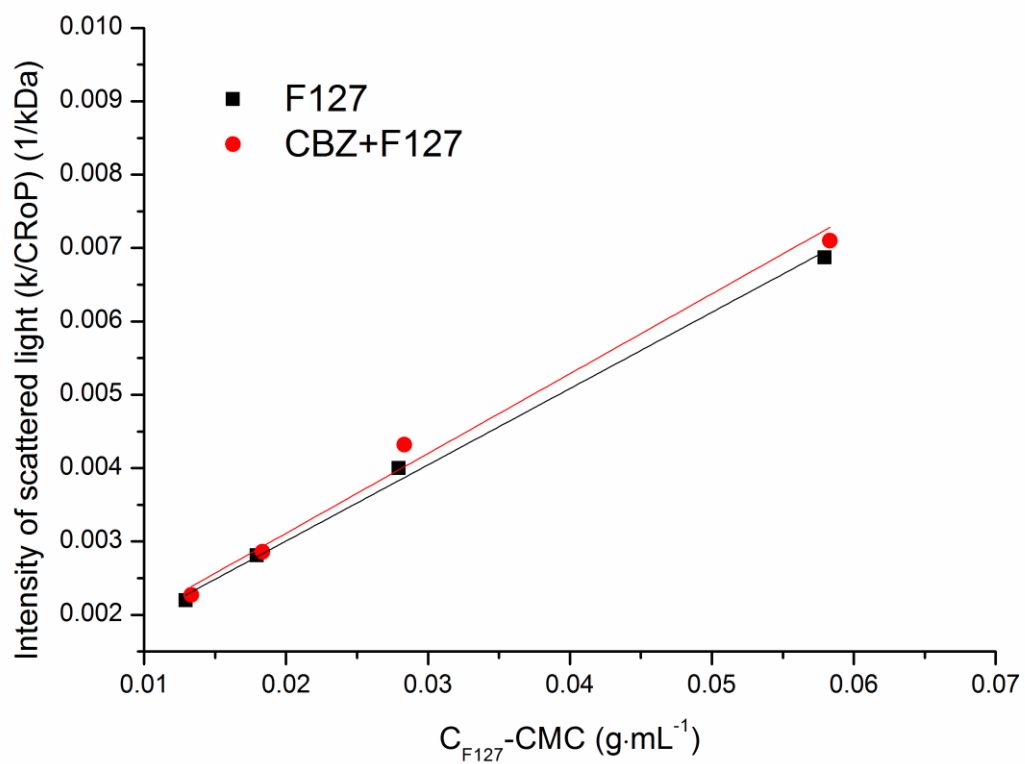

**Figure S3.** Debye-plots for systems of F-127 (black squares) and F127+CBZ (red circles) in buffer pH 6.8.

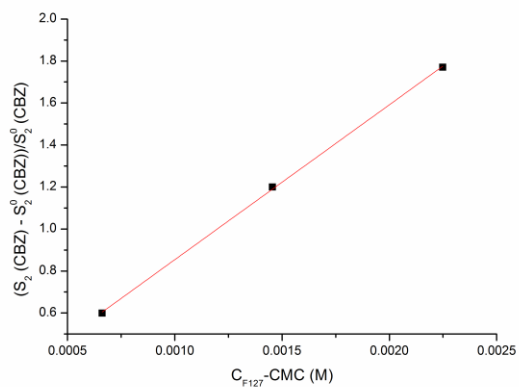

(a)

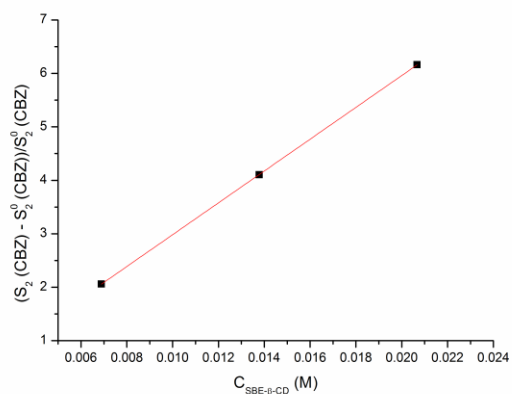

(b)

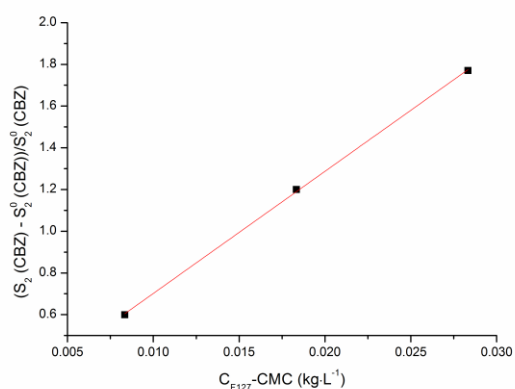

(c)

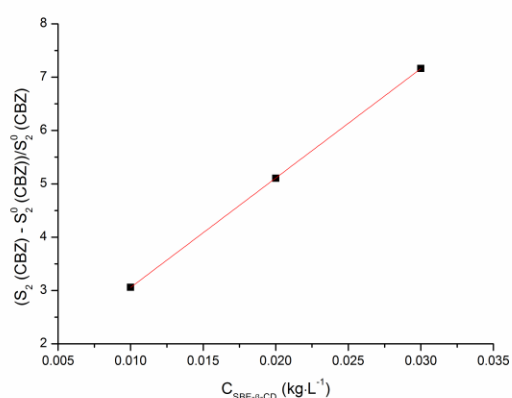

(d)

**Figure S4.** Plots of  $(S_2(CBZ) - S_2^0(CBZ)) / S_2^0(CBZ)$  on  $(C_{F127-CMC})$  (a,c) and  $C_{SBE-\beta-CD}$  (b,d) dependences used for the F127/buffer and SBE- $\beta$ -CD/buffer partition coefficients calculation (a) and (b) - from molar concentrations, (c) and (d) - from the concentrations expressed in kg·L<sup>-1</sup> units; 37 °C.

**Table S1.** Solubility of CBZ at 37.0±0.1°C.

| F-127concentration<br>(mmol·L <sup>-1</sup> ) | Solubility in buffer<br>pH 6.8+F-127 (mol·L <sup>-1</sup> ) | SBE-β-CD concentration<br>(mmol·L <sup>-1</sup> ) | Solubility in buffer<br>pH 6.8+SBE-β-CD (mol·L <sup>-1</sup> ) |
|-----------------------------------------------|-------------------------------------------------------------|---------------------------------------------------|----------------------------------------------------------------|
| 0                                             | (8.30±0.14)·10 <sup>-4</sup>                                | 0                                                 | (8.30±0.14)·10 <sup>-4</sup>                                   |
| 1.33                                          | (1.33±0.05)·10 <sup>-3</sup>                                | 6.89                                              | (2.54±0.06)·10 <sup>-3</sup>                                   |
| 1.83                                          | (1.83±0.06)·10 <sup>-3</sup>                                | 13.78                                             | (4.24±0.11)·10 <sup>-3</sup>                                   |
| 2.30                                          | (2.30±0.08)·10 <sup>-3</sup>                                | 20.67                                             | (5.95±0.14)·10 <sup>-3</sup>                                   |

**Table S2.** Free fraction (*f*<sub>free</sub>) of CBZ at different excipient concentrations.

| F-127concentration<br>(mmol·L <sup>-1</sup> ) | Free fraction of CBZ | SBE-β-CD concentration<br>(mmol·L <sup>-1</sup> ) | Free fraction of CBZ |
|-----------------------------------------------|----------------------|---------------------------------------------------|----------------------|
| 0                                             | 1                    | 0                                                 | 1                    |
| 1.33                                          | 0.647                | 6.89                                              | 0.288                |
| 1.83                                          | 0.454                | 13.78                                             | 0.168                |
| 2.30                                          | 0.350                | 20.67                                             | 0.119                |

**Table S3.** Donor solution concentrations (*C*<sub>0</sub>) and steady state flux (*J*) of CBZ in pure buffer pH 6.8 and in F127 and SBE-β-CD solutions at 37 °C.

| C <sub>excipient</sub><br>(mmol·L <sup>-1</sup> ) | Initial parameters of the permeation experiments |                                                  |
|---------------------------------------------------|--------------------------------------------------|--------------------------------------------------|
|                                                   | <i>C</i> <sub>0</sub> (mol·L <sup>-1</sup> )     | <i>J</i> (μM·cm <sup>-2</sup> ·s <sup>-1</sup> ) |
| RC                                                |                                                  |                                                  |
| 0                                                 | 5.95·10 <sup>-4</sup>                            | 3.31·10 <sup>-5</sup>                            |
| F127                                              |                                                  |                                                  |
| 1.33                                              | 7.31·10 <sup>-4</sup>                            | 2.36·10 <sup>-5</sup>                            |
| 1.83                                              | 8.31·10 <sup>-4</sup>                            | 2.21·10 <sup>-5</sup>                            |
| 2.30                                              | 1.350·10 <sup>-3</sup>                           | 2.75·10 <sup>-5</sup>                            |
| SBE-β-CD                                          |                                                  |                                                  |
| 6.89                                              | 1.55·10 <sup>-3</sup>                            | 3.19·10 <sup>-5</sup>                            |
| 13.78                                             | 2.31·10 <sup>-3</sup>                            | 3.09·10 <sup>-5</sup>                            |
| 20.67                                             | 4.71·10 <sup>-3</sup>                            | 5.85·10 <sup>-5</sup>                            |
| PDS                                               |                                                  |                                                  |
| 0                                                 | 4.97·10 <sup>-4</sup>                            | 2.82·10 <sup>-7</sup>                            |
| F127                                              |                                                  |                                                  |
| 1.33                                              | 7.18·10 <sup>-4</sup>                            | 2.05·10 <sup>-7</sup>                            |
| 1.83                                              | 8.31·10 <sup>-4</sup>                            | 2.10·10 <sup>-7</sup>                            |
| 2.30                                              | 8.92·10 <sup>-4</sup>                            | 1.91·10 <sup>-7</sup>                            |
| SBE-β-CD                                          |                                                  |                                                  |
| 6.89                                              | 1.53·10 <sup>-3</sup>                            | 1.94·10 <sup>-7</sup>                            |
| 13.78                                             | 3.06·10 <sup>-3</sup>                            | 2.43·10 <sup>-7</sup>                            |
| 20.67                                             | 4.21·10 <sup>-3</sup>                            | 2.38·10 <sup>-7</sup>                            |

**Table S4.** Viscosity of the donor solutions at 37 °C.

| F-127concentration<br>(mmol·L <sup>-1</sup> ) | Viscosity (MPa) | SBE-β-CD concentration<br>(mmol·L <sup>-1</sup> ) | Viscosity (MPa) |
|-----------------------------------------------|-----------------|---------------------------------------------------|-----------------|
| 0                                             | 0.71            | 0                                                 | 0.71            |
| 1.33                                          | 0.84            | 6.89                                              | 0.72            |
| 1.83                                          | 0.88            | 13.78                                             | 0.75            |
| 2.30                                          | 1.09            | 20.67                                             | 0.80            |
